# Supplementary material
Source: publisher figshare collection journal article supplement (https://rs.figshare.com/ndownloader/files/10912307)
Supplement: Supplementary file 1 [file 10912307]

## Sheet: Summary table
ESM4: Summary of genes associated to metal-DMR, gene location, reported interactions with BED effector proteins and associated ANN scores.
Title: In silico epigenetics of metal exposure and subclinical atherosclerosis in middle age men: pilot results from the AWHS study
Authors: Angela L. Riffo-Campos, Azahara Fuentes-Trillo, Wan Y. Tang, Zoraida Soriano, Griselda De Marco, Pilar Rentero-Garrido, Victoria Adam-Felici, Veronica Lendinez-Tortajada, Kevin Francesconi, Walter Goessler, Christine Ladd-Acosta, Montse Leon-Latre, Jose A. Casasnovas, F. Javier Chaves, Ana Navas-Acien, Eliseo Guallar, Maria Tellez-Plaza
Chromosome	Gene Name	ENTREZ	UniProt	Diff. methylated in Atherosclerosis	# Interacctions with diff. Meth. genes in atherosclerosis	Metals
						Inorganic arsenic	Cadmium	Antimony	Tungsten
chr5	IRF1	3659	P10914	1	0	1	0	0	0
chr8	DLGAP2	9228	Q9P1A6	1	1	0	1	0	1
chr7	MAD1L1	8379	Q9Y6D9	1	2	0	0	0	1
chr12	NCOR2	9612	Q9Y618	1	3	0	0	0	1
chr13	IRS2	8660	Q9Y4H2	1	3	0	1	0	0
chr11	KCNK7	10089	Q9Y2U2	1	0	0	0	0	1
chr8	MRPS28	28957	Q9Y2Q9	1	1	1	0	0	0
chr10	DIP2C	22982	Q9Y2E4	1	0	0	0	0	1
chr13	WASF3	10810	Q9UPY6	1	0	1	1	0	1
chr17	RPH3AL	9501	Q9UNE2	1	0	1	1	0	1
chr11	FBXO3	26273	Q9UK99	1	1	1	0	0	0
chr6	RGS17	26575	Q9UGC6	1	1	0	1	0	0
chr12	NINJ2	4815	Q9NZG7	1	0	0	1	0	1
chr1	FMN2	56776	Q9NZ56	1	0	0	0	0	1
chr16	KCTD5	54442	Q9NXV2	1	0	0	1	0	1
chr8	AGPAT5	55326	Q9NUQ2	1	1	1	0	0	1
chr6	ZFP57	346171	Q9NU63	1	0	0	1	0	0
chr12	KRT82	3888	Q9NSB4	1	0	0	1	0	0
chr11	LTBP3	4054	Q9NS15	1	1	0	1	0	0
chr14	LTB4R2	56413	Q9NPC1	1	1	1	0	0	1
chr5	MYO10	4651	Q9HD67	1	1	1	0	0	0
chr3	NT5DC2	64943	Q9H857	1	0	0	1	0	0
chr20	CST9L	128821	Q9H4G1	1	0	1	0	0	0
chr6	RNF39	80352	Q9H2S5	1	0	0	0	0	1
chr6	OR2H1	26716	Q9GZK4	1	0	1	0	0	0
chr20	SLC17A9	63910	Q9BYT1	1	0	1	0	0	0
chr2	COLEC11	78989	Q9BWP8	1	0	0	0	1	0
chr19	RNF126	55658	Q9BV68	1	1	0	1	0	0
chr19	MRI1	84245	Q9BV20	1	0	0	1	0	1
chr17	TBCD	6904	Q9BTW9	1	3	0	1	0	0
chr14	SLC25A21	89874	Q9BQT8	1	0	0	0	1	1
chr19	ARID3A	1820	Q99856	1	1	0	0	1	0
chr16	PRR25	388199	Q96S07	1	0	0	0	0	1
chr13	SPATA13	221178	Q96N96	1	0	0	0	0	1
chr4	MAML3	55534	Q96JK9	1	1	0	1	0	1
chr12	PIWIL1	9271	Q96J94	1	0	0	1	0	0
chr16	C16orf74	404550	Q96GX8	1	0	0	0	1	0
chr12	DDX11	1663	Q96FC9	1	1	0	1	0	1
chr19	HOOK2	29911	Q96ED9	1	1	1	1	0	0
chr1	MARC2	54996	Q969Z3	1	0	0	1	0	0
chr13	ARL11	115761	Q969Q4	1	0	0	1	1	0
chr8	TOP1MT	116447	Q969P6	1	0	0	1	0	0
chr11	NRGN	4900	Q92686	1	0	0	1	0	0
chr2	PXDN	7837	Q92626	1	1	1	0	0	0
chr16	PIEZO1	9780	Q92508	1	0	0	0	1	1
chr1	ACOT11	26027	Q8WXI4	1	0	0	1	0	0
chr5	SH3TC2	79628	Q8TF17	1	0	1	0	0	0
chr5	DNAH5	1767	Q8TE73	1	0	0	1	0	0
chr12	WDR66	144406	Q8TBY9	1	0	0	0	1	0
chr2	CLHC1	130162	Q8NHS4	1	0	1	0	0	0
chr11	DYNC2H1	79659	Q8NCM8	1	1	0	0	0	1
chr11	SYT8	90019	Q8NBV8	1	0	0	1	0	0
chr1	DRAXIN	374946	Q8NBI3	1	0	0	0	0	1
chr7	ZFAND2A	90637	Q8N6M9	1	0	1	0	0	1
chr9	MRPL41	64975	Q8IXM3	1	1	0	1	0	0
chr7	FAM20C	56975	Q8IXL6	1	0	0	0	1	0
chr14	NPAS3	64067	Q8IXF0	1	0	0	1	0	0
chr20	SULF2	55959	Q8IWU5	1	0	0	1	0	0
chr16	XYLT1	64131	Q86Y38	1	0	0	1	0	0
chr8	ERICH1	157697	Q86X53	1	0	0	0	1	1
chr10	ADGRA1	84435	Q86SQ6	1	0	1	0	0	0
chr7	SDK1	221935	Q7Z5N4	1	1	0	1	1	1
chr2	GDF7	151449	Q7Z4P5	1	0	1	1	0	1
chr10	KNDC1	85442	Q76NI1	1	0	1	0	0	0
chr12	FAM101A	144347	Q6ZTI6	1	0	0	0	0	1
chr15	THSD4	79875	Q6ZMP0	1	0	0	0	1	0
chr6	SFTA2	389376	Q6UW10	1	0	0	0	0	1
chr8	SLC39A4	55630	Q6P5W5	1	1	0	0	0	1
chr1	MAST2	23139	Q6P0Q8	1	2	0	1	0	0
chr4	FAM53A	152877	Q6NSI3	1	1	0	0	1	0
chr1	PM20D1	148811	Q6GTS8	1	0	1	0	1	1
chr9	FAM69B	138311	Q5VUD6	1	0	0	0	1	0
chr1	LCE3A	353142	Q5TA76	1	0	0	1	0	0
chr1	BRDT	676	Q58F21	1	0	0	1	0	0
chr2	SFT2D3	84826	Q587I9	1	0	0	1	0	0
chr6	HLA-DRB5	3127	Q30154	1	4	1	0	0	1
chr1	CR1L	1379	Q2VPA4	1	0	0	0	0	1
chr22	TAB1	10454	Q15750	1	2	0	0	1	1
chr10	INPP5A	3632	Q14642	1	1	0	0	0	1
chr1	DHX9	1660	Q08211	1	2	1	1	0	0
chr11	ZBTB16	7704	Q05516	1	3	0	1	0	0
chr4	MYL5	4636	Q02045	1	1	1	0	0	0
chr1	ROR1	4919	Q01973	1	3	0	0	1	0
chr15	SMAD3	4088	P84022	1	12	0	1	0	0
chr21	SLC37A1	54020	P57057	1	0	0	1	0	0
chr7	EIF3B	8662	P55884	1	1	0	1	0	1
chr19	LGALS7	3963	P47929	1	0	1	0	0	0
chr7	HTR5A	3361	P47898	1	4	0	0	1	1
chr4	GABRA2	2555	P47869	1	0	0	1	0	0
chr2	HAAO	23498	P46952	1	0	0	0	0	1
chr6	HLA-F	3134	P30511	1	2	1	1	0	0
chr12	KCNA6	3742	P17658	1	1	1	0	0	0
chr10	MGMT	4255	P16455	1	1	0	0	1	0
chr2	COL6A3	1293	P12111	1	3	1	0	0	1
chr6	HLA-C	3107	P10321	1	1	1	1	1	0
chr17	GAA	2548	P10253	1	1	1	0	0	0
chr6	PKHD1	5314	P08F94	1	0	1	0	0	0
chr11	LDHC	3948	P07864	1	1	0	0	0	1
chr13	PCCA	5095	P05165	1	0	0	0	0	1
chr11	FTH1	2495	P02794	1	1	1	0	0	0
chr6	HLA-DQA2	3118	P01906	1	4	0	0	0	1
chr6	HLA-B	3106	P01889	1	0	1	0	1	0
chr6	EYA4	2070	O95677	1	0	0	0	0	1
chr18	NFATC1	4772	O95644	1	2	0	1	0	0
chr20	GNAS	2778	O95467	1	1	1	0	0	0
chr6	SPDEF	25803	O95238	1	0	0	1	1	0
chr5	ABLIM3	22885	O94929	1	1	1	0	0	0
chr7	ADAP1	11033	O75689	1	0	0	0	0	1
chr5	TBCA	6902	O75347	1	2	0	0	0	1
chr7	DNAJB6	10049	O75190	1	1	0	1	1	1
chr1	NPHP4	261734	O75161	1	1	1	0	0	0
chr9	LMX1B	4010	O60663	1	2	0	1	0	0
chr5	RGS14	10636	O43566	1	2	1	1	0	0
chr10	SCD	6319	O00767	1	1	1	0	0	0
chr13	SOX1	6656	O00570	1	0	0	1	0	0
chr20	NOP56	10528	O00567	1	6	1	0	0	0
chr5	AHRR	57491	A9YTQ3	1	1	0	0	1	0
chr7	UNCX	340260	A6NJT0	1	0	0	1	1	1
chr16	CCDC154	645811	A6NI56	1	0	0	0	0	1
chr11	ARHGAP42	143872	A6NI28	1	0	0	1	0	0
chr5	C5orf63	401207	A6NC05	1	0	1	0	0	0
chr3	SLC12A8	84561	A0AV02	1	0	0	0	1	1
chr2	HDAC4	9759	P56524	0	7	0	0	1	1
chr16	SSTR5	6755	P35346	0	7	0	0	1	0
chr11	AP2A2	161	O94973	0	6	0	1	0	0
chr10	CXCL12	6387	P48061	0	5	0	0	1	1
chr20	SSTR4	6754	P31391	0	5	1	0	0	0
chr6	NOTCH4	4855	Q99466	0	4	0	1	0	0
chr16	DNAJA3	9093	Q96EY1	0	4	0	0	1	0
chr6	HLA-DQB2	3120	P05538	0	4	0	0	0	1
chr6	HLA-DQB1	3119	P01920	0	4	1	0	1	1
chr9	TLR4	7099	O00206	0	3	1	0	0	0
chr6	MRPS18A	55168	Q9NVS2	0	3	0	0	1	0
chr13	LATS2	26524	Q9NRM7	0	3	0	0	1	0
chr7	MAGI2	9863	Q86UL8	0	3	0	0	0	1
chr13	MTUS2	23281	Q5JR59	0	3	0	1	0	0
chr3	TNK2	10188	Q07912	0	3	0	1	0	0
chr6	COL11A2	1302	P13942	0	3	1	0	0	0
chr1	SKI	6497	P12755	0	3	0	0	1	0
chr11	SHANK2	22941	Q9UPX8	0	2	0	1	0	0
chr1	MRTO4	51154	Q9UKD2	0	2	1	0	0	0
chr14	EVL	51466	Q9UI08	0	2	0	0	1	0
chr1	WRAP73	49856	Q9P2S5	0	2	0	0	1	0
chr5	WDR36	134430	Q8NI36	0	2	0	0	1	0
chr8	SCARA3	51435	Q6AZY7	0	2	0	0	1	1
chr19	RAB11B	9230	Q15907	0	2	0	0	0	1
chr17	LASP1	3927	Q14847	0	2	0	0	0	1
chr12	CACNA1C	775	Q13936	0	2	0	0	0	1
chr6	HIST1H3D	8351	P68431	0	2	1	0	0	0
chr1	KCNN3	3782	Q9UGI6	0	1	0	0	1	0
chr11	TCP11L1	55346	Q9NUJ3	0	1	0	0	0	1
chr10	XPNPEP1	7511	Q9NQW7	0	1	0	1	0	0
chr11	SPON1	10418	Q9HCB6	0	1	0	1	0	0
chr1	RRAGC	64121	Q9HB90	0	1	0	0	1	1
chr6	ALDH8A1	64577	Q9H2A2	0	1	1	0	0	1
chr3	BOC	91653	Q9BWV1	0	1	0	0	0	1
chr12	WIBG	84305	Q9BRP8	0	0	0	0	1	0
chr6	PACRG	135138	Q96M98	0	1	0	0	0	1
chr7	RADIL	55698	Q96JH8	0	1	0	0	0	1
chr16	JPH3	57338	Q8WXH2	0	1	0	1	0	0
chr17	TBC1D16	125058	Q8TBP0	0	1	0	0	1	0
chr1	INADL	10207	Q8NI35	0	1	1	0	0	0
chr11	C11orf53	341032	Q8IXP5	0	1	0	1	0	0
chr1	CASZ1	54897	Q86V15	0	1	0	1	0	0
chr1	RD3	343035	Q7Z3Z2	0	1	0	1	0	0
chrX	PDZD4	57595	Q76G19	0	1	0	1	0	0
chr1	KCNAB2	8514	Q13303	0	1	0	1	0	0
chr1	FMOD	2331	Q06828	0	1	1	0	0	0
chr2	PAX8	7849	Q06710	0	1	1	0	0	1
chr6	TNXB	7148	P22105	0	1	0	0	0	1
chr4	SLC25A4	291	P12235	0	1	0	0	1	0
chr12	KRT3	3850	P12035	0	1	0	0	1	0
chr2	NXPH2	11249	O95156	0	1	0	1	0	0
chr1	PLCH2	9651	O75038	0	1	0	0	0	1
chr19	FCGBP	8857	Q9Y6R7	0	0	1	0	0	0
chr3	IGF2BP2	10644	Q9Y6M1	0	0	0	1	0	0
chr8	CPQ	10404	Q9Y646	0	0	1	1	0	0
chr13	FARP1	10160	Q9Y4F1	0	0	0	0	0	1
chr1	PADI2	11240	Q9Y2J8	0	0	0	1	0	0
chr14	SAMD4A	23034	Q9UPU9	0	0	0	1	0	0
chr9	LHX6	26468	Q9UPM6	0	0	1	0	0	0
chr8	ZFAT	57623	Q9P243	0	0	0	1	0	1
chr5	KCNIP1	30820	Q9NZI2	0	0	0	1	0	0
chr2	SNTG2	54221	Q9NY99	0	0	0	1	0	0
chr12	SLC6A13	6540	Q9NSD5	0	0	0	1	0	1
chr5	ESM1	11082	Q9NQ30	0	0	0	0	0	1
chr8	EFCAB1	79645	Q9HAE3	0	0	0	1	0	0
chr8	DCSTAMP	81501	Q9H295	0	0	1	0	0	0
chr21	SPATC1L	84221	Q9H0A9	0	0	0	0	1	0
chr1	GPR88	54112	Q9GZN0	0	0	0	0	0	1
chr7	LRRC61	65999	Q9BV99	0	0	1	0	0	0
chr6	KCNK16	83795	Q96T55	0	0	0	1	0	0
chr7	FAM71F1	84691	Q96KD3	0	0	0	0	1	0
chr14	L3HYPDH	112849	Q96EM0	0	0	0	1	0	0
chr6	FAM120B	84498	Q96EK7	0	0	0	1	0	0
chr10	LARP4B	23185	Q92615	0	0	0	1	0	0
chr14	DCAF11	80344	Q8TEB1	0	0	0	0	1	0
chr8	SLC26A7	115111	Q8TE54	0	0	1	0	0	0
chr17	MYCBPAP	84073	Q8TBZ2	0	0	0	1	0	0
chr17	B4GALNT2	124872	Q8NHY0	0	0	0	1	0	0
chr12	OR10P1	121130	Q8NGE3	0	0	0	0	1	0
chr6	ARID1B	57492	Q8NFD5	0	0	0	1	0	1
chr1	MFSD2A	84879	Q8NA29	0	0	0	1	0	0
chr9	EXD3	54932	Q8N9H8	0	0	1	0	0	0
chr19	ZNF808	388558	Q8N4W9	0	0	0	0	0	1
chr1	OR2L13	284521	Q8N349	0	0	0	0	0	1
chr18	PQLC1	80148	Q8N2U9	0	0	0	0	1	1
chr10	ZCCHC24	219654	Q8N2G6	0	0	0	1	0	0
chr8	RDH10	157506	Q8IZV5	0	0	1	0	0	0
chr3	PIGZ	80235	Q86VD9	0	0	0	1	0	0
chr14	ASPG	374569	Q86U10	0	0	0	1	0	0
chr5	C5orf38	153571	Q86SI9	0	0	0	0	0	1
chr4	CYP2U1	113612	Q7Z449	0	0	0	1	0	1
chr1	CATSPER4	378807	Q7RTX7	0	0	0	0	0	1
chr17	C17orf97	400566	Q6ZQX7	0	0	1	0	0	0
chr10	LYZL1	84569	Q6UWQ5	0	0	1	0	0	0
chr12	ADGRD1	283383	Q6QNK2	0	0	0	0	0	1
chr15	C15orf26	161502	Q6P656	0	0	0	0	0	1
chr10	FRMPD2	143162	Q68DX3	0	0	1	0	0	0
chr9	MORN5	254956	Q5VZ52	0	0	1	0	0	0
chr19	RASIP1	54922	Q5U651	0	0	1	0	0	0
chrX	ZC3H12B	340554	Q5HYM0	0	0	0	1	0	0
chr8	TRMT12	55039	Q53H54	0	0	0	0	1	0
chr1	NKAIN1	79570	Q4KMZ8	0	0	0	0	0	1
chr12	GLIPR1L2	144321	Q4G1C9	0	0	0	0	1	0
chr4	ZNF718	255403	Q3SXZ3	0	0	1	1	0	0
chr18	SMIM21	284274	Q3B7S5	0	0	0	1	0	0
chr11	EML3	256364	Q32P44	0	0	0	1	0	0
chr11	ATHL1	80162	Q32M88	0	0	0	1	1	0
chr1	TOMM20	9804	Q15388	0	0	0	0	1	0
chr1	UBAP2L	9898	Q14157	0	0	0	1	0	1
chr16	MSLN	10232	Q13421	0	0	0	0	1	1
chr11	ST5	6764	P78524	0	0	0	1	0	0
chr5	IRX1	79192	P78414	0	0	1	0	0	0
chr13	CLDN10	9071	P78369	0	1	0	0	0	1
chr14	DAD1	1603	P61803	0	0	0	0	0	1
chr11	DNAJB13	374407	P59910	0	0	0	0	0	1
chr5	ADAMTS12	81792	P58397	0	0	1	0	0	0
chr8	EPPK1	83481	P58107	0	1	1	0	0	0
chr7	CLDN15	24146	P56746	0	1	1	0	0	0
chr20	CDH4	1002	P55283	0	0	1	0	1	0
chr16	EMP2	2013	P54851	0	0	0	1	0	0
chr8	MYOM2	9172	P54296	0	0	1	0	0	0
chr21	SLC19A1	6573	P41440	0	0	0	0	1	0
chr5	GDNF	2668	P39905	0	0	0	0	1	0
chr16	CDH5	1003	P33151	0	0	0	1	0	0
chr19	CYP2A7	1549	P20853	0	0	0	0	1	1
chr19	ZNF708	7562	P17019	0	0	1	0	0	1
chr22	LIF	3976	P15018	0	0	0	0	0	1
chr1	F3	2152	P13726	0	0	0	0	0	1
chr10	ARMS2	387715	P0C7Q2	0	0	0	1	0	0
chr6	HLA-DQA1	3117	P01909	0	0	0	0	1	0
chr1	NPPA	4878	P01160	0	0	0	0	0	1
chr12	PAH	5053	P00439	0	0	0	0	0	1
chr3	ZMYND10	51364	O75800	0	0	0	1	0	0
chr14	TM9SF1	10548	O15321	0	0	1	0	0	0
chr20	SNPH	9751	O15079	0	0	0	1	0	0
chr8	ARHGEF10	9639	O15013	0	0	0	1	0	0
chr21	DSCR3	10311	O14972	0	0	1	0	0	0
chr1	IRF6	3664	O14896	0	0	0	0	0	1
chr12	CDK2AP1	8099	O14519	0	0	0	0	0	1
chr6	STMND1	401236	H3BQB6	0	0	0	1	0	0
chr20	ISM1	140862	B1AKI9	0	0	1	0	0	0
chr1	CAPN8	388743	A6NHC0	0	0	0	0	1	0
chr8	NKAIN3	286183	Q8N8D7	0	0	1	0	0	0
chr6	HCG22	285834	E2RYF7	1	0	1	0	1	0
chr6	HLA-DPB2	3116	-	1	0	0	0	1	0
chr6	HLA-DRB6	3128	-	1	0	1	1	1	1
chr6	HLA-H	3136	-	1	0	0	1	0	0
chr6	HLA-J	3137	-	1	0	0	0	0	1
chr9	SNHG7	84973	-	1	0	0	0	0	1
chr16	PRSS30P	124221	-	1	0	0	1	0	0
chr19	LINC00906	148145	-	1	0	1	0	0	0
chr2	MYADML	151325	-	1	0	0	0	1	0
chr6	LOC154449	154449	-	1	0	0	1	0	0
chr10	SEPT7P9	285961	-	1	0	0	0	1	0
chr6	FLJ46906	441172	-	1	0	0	0	1	0
chr5	SDHAP3	728609	-	1	0	1	0	0	1
chr22	LINC01310	100128946	-	1	0	0	0	0	1
chr17	MIR4520-1	100616401	-	1	0	1	1	0	1
chr17	LRRC37A4P	55073	-	0	0	1	0	0	0
chr20	LINC00266-1	140849	-	0	0	0	0	1	0
chr20	LINC00028	140875	-	0	0	0	0	0	1
chr20	LINC00654	149837	-	0	0	0	1	0	0
chr1	LOC339529	339529	-	0	0	0	1	0	0
chr2	LINC00298	339788	-	0	0	1	0	0	0
chr2	LOC339807	339807	-	0	0	1	0	0	0
chr15	WASH3P	374666	-	0	0	0	0	1	0
chr10	LINC01168	399829	-	0	0	1	1	0	1
chr7	TARP	445347	-	0	0	0	0	0	1
chrX	MIR510	574515	-	0	0	0	1	0	0
chr1	NBPF13P	644861	-	0	0	0	1	0	1
chr13	MIPEPP3	650794	-	0	0	0	0	0	1
chr5	VTRNA2-1	100126299	-	0	0	1	0	0	1
chr19	SNAR-F	100126781	-	0	0	0	0	1	0
chr6	PSORS1C3	100130889	-	0	0	1	0	0	1
chr4	LOC100133461	100133461	-	0	0	1	0	0	0
chr16	MIR3180-3	100422836	-	0	0	0	0	0	1
chr8	LINC01606	100507651	-	0	0	1	0	0	0
chr1	GJA9-MYCBP	100527950	-	0	0	0	1	0	0
chr11	MIR4686	100616126	-	0	0	0	1	0	1
chr2	LINC01115	339822	-	1	0	0	0	1	0
chr8	ERICH1-AS1	619343	-	1	0	0	1	0	0
